# Supplementary material for: Modification of cellulose model surfaces by cationic polymer latexes prepared by RAFT-mediated surfactant-free emulsion polymerization
Source: Royal Society of Chemistry journal article supplement (doi:10.1039/c4py00675e), 2014-06-30
Supplement: c4py00675e1.pdf [file c4py00675e1.pdf]

## Determination of the degree of hydrolysis of DMAEMA during its RAFT polymerization in water

By  $^1\text{H}$ -NMR it was possible to study the extent of DMAEMA hydrolysis during its RAFT polymerization in water at pH 7 (Figure S1). This was monitored by the appearance of the signals at  $\delta = 5.62$  ppm (e) and  $\delta = 5.31$  ppm (f) from the vinyl protons in MAA and two methylenes ( $-\text{CH}_2$ ) from the formed ethanolamine at  $\delta = 3.86$  ppm (g) and  $\delta = 3.26$  ppm (h). The chemical shifts for the  $-\text{CH}_2$  protons in both the monomer, DMAEMA and the polymer, PDMAEMA are known, located at  $\delta = 4.49$  (c) and 3.52 ppm (d) for DMAEMA and at  $\delta = 4.36$  and 3.36 ppm in PDMAEMA. The signals at  $\delta = 3.52$  ppm (d) consists of a triplet and a singlet from  $-\text{CH}_2$  from both monomer and polymer. Hence, the degree of hydrolysis (DH) of DMAEMA can be determined from the amount of hydrolyzed DMAEMA ( $I_{3.26}$ ) and the total initial amount of DMAEMA ( $I_{3.26} + I_{3.52}$ ) (equation S1 and Figure S2).

$$DH(\%) = \frac{I_{3.26}}{I_{3.26} + I_{3.52}} \times 100 \quad (\text{S1})$$

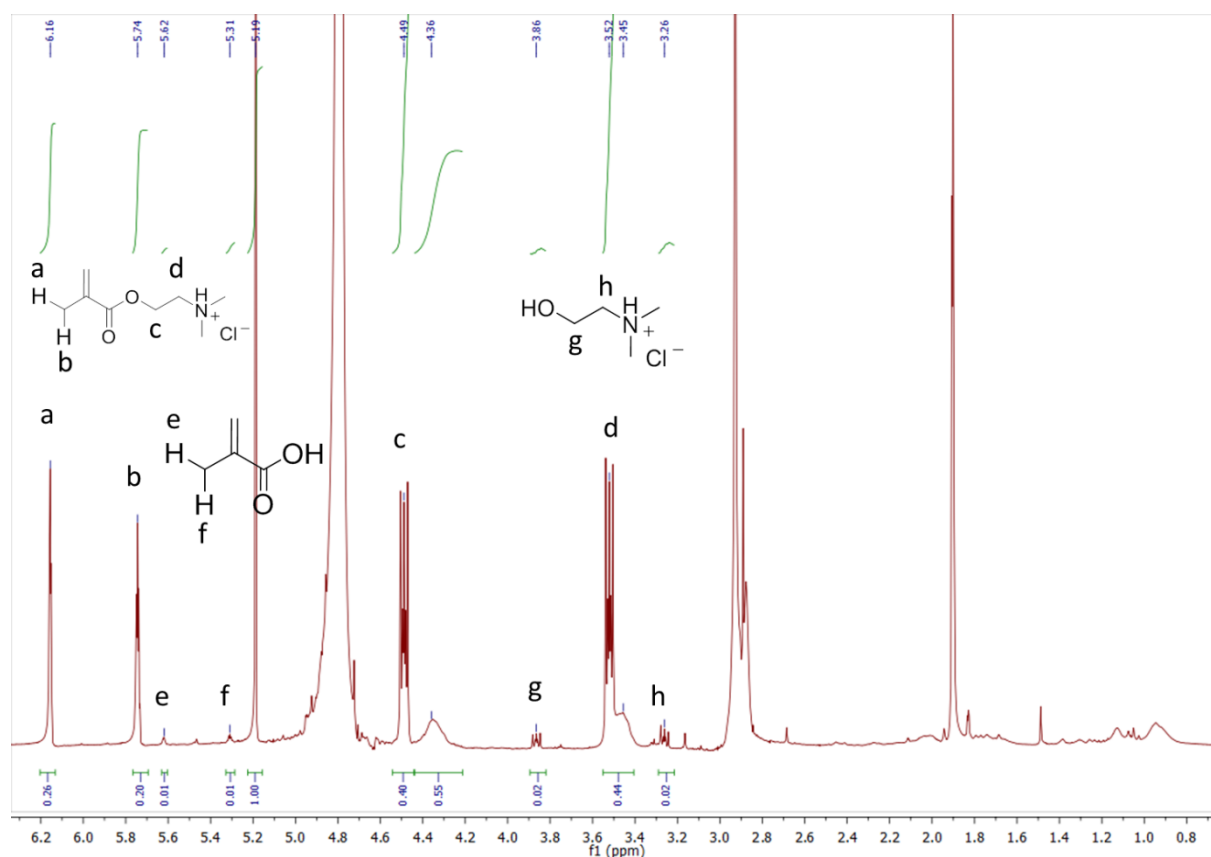

**Figure S1.** NMR spectrum during synthesis ( $t = 20$  min) of the macroRAFT,  $\text{P}(\text{DMAEMA-co-MAA})$ , in  $\text{D}_2\text{O}$ . 1,3,5-trioxane was used as an internal reference and the integral was set to 1.

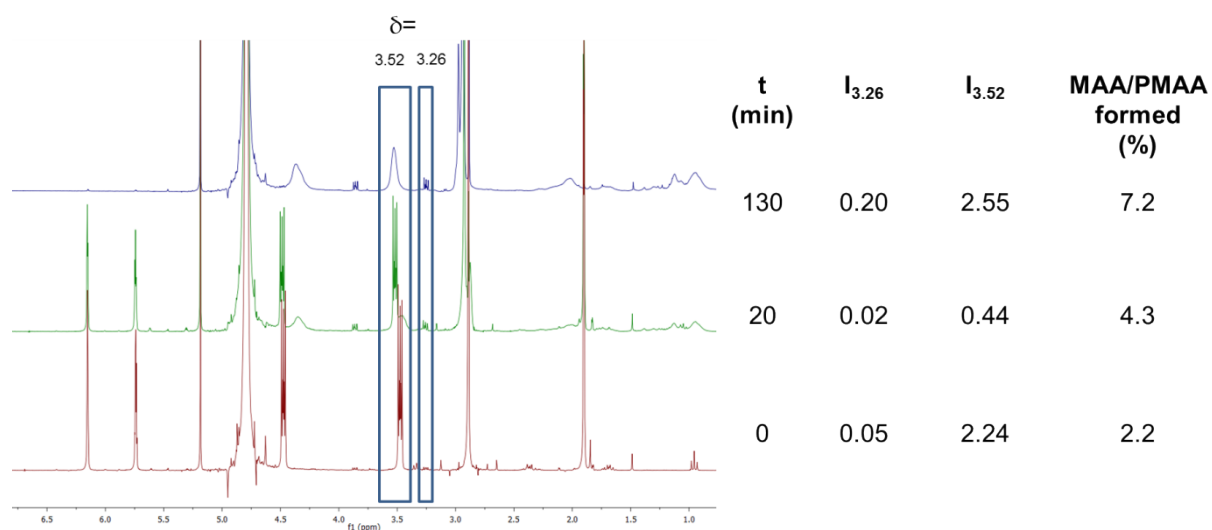

**Figure S2.**  $^1\text{H}$  NMR spectra during synthesis ( $t = 0, 20$  and  $130$  min) of the macroRAFT,  $\text{P(DMAEMA-co-MAA)}$ , in  $\text{D}_2\text{O}$ . 1,3,5- trioxane was used as an internal reference and the integral was set to 1.

**Determination of the molar mass of P(DMAEMA-*co*-MAA) by MALDI-ToF**

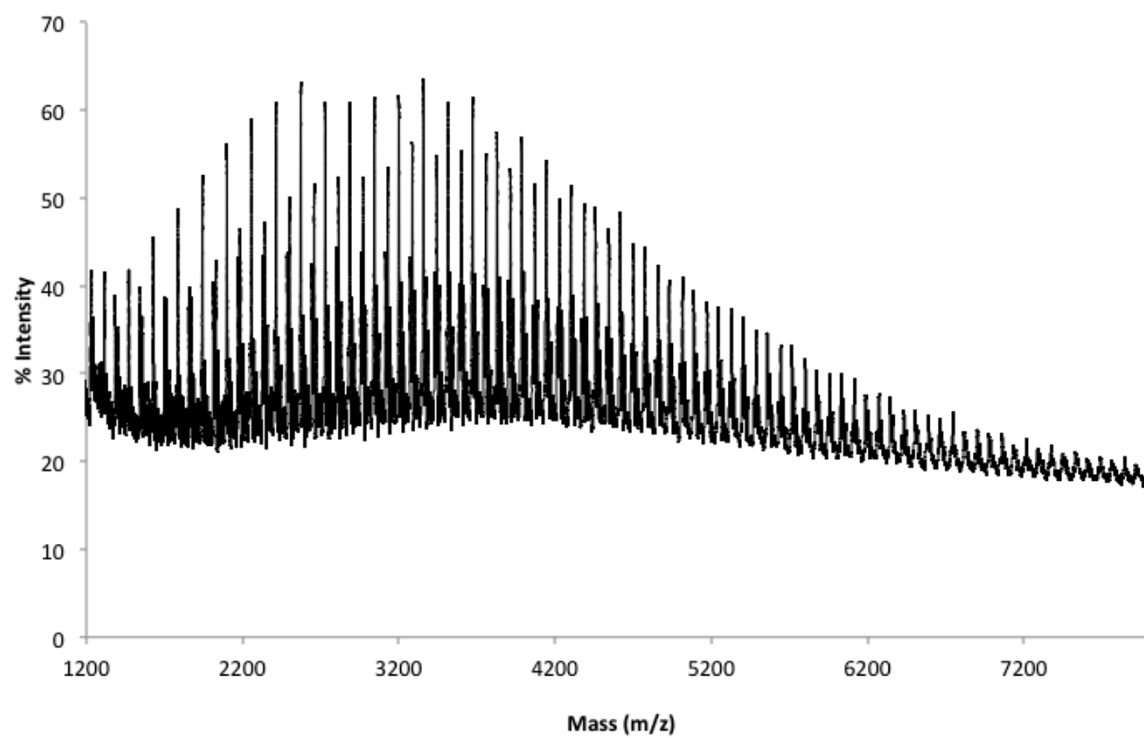

**Figure S3.** MALDI-ToF spectrum of P(DMAEMA-*co*-MAA) after purification.

## Determination of the glass transition temperatures of P(DMAEMA-*co*-MAA) and Latex 1 – 4 by DSC

**Table S1.** Glass transition temperature of the macroRAFT P(DMAEMA-*co*-MAA) and Latex 1-4 determined by DSC.

| Entry     | T <sub>g</sub> (°C) |
|-----------|---------------------|
| macroRAFT | 107.7               |
| Latex 1   | 115.5               |
| Latex 2   | 116.4               |
| Latex 3   | 119.3               |
| Latex 4   | 121.4               |

### Adsorption measurements of Latex 1 – 4 in the QCM-D

The adsorption measurements in the QCM-D were performed at continuous flow, 0.15 ml min<sup>-1</sup>. First, a stable baseline with Milli-Q water was obtained.

$t_0 - t_1$  Milli-Q water

$t_1 - t_2$  Latex dispersion (100 mg L<sup>-1</sup>)

$t_2 - t_3$  Milli-Q water

**Table S2.** Time intervals for adsorption measurements performed in the QCM-D.

| time (min)  | Latex 1 | Latex 2 | Latex 3 | Latex 4 |
|-------------|---------|---------|---------|---------|
| $t_0 - t_1$ | 0 - 3   | 0 - 3   | 0 - 3   | 0 - 3   |
| $t_1 - t_2$ | 3 - 32  | 3 - 27  | 3 - 24  | 3 - 60  |
| $t_2 - t_3$ | 32 - 40 | 27 - 67 | 24 - 32 | 60 - 70 |
